# Supplementary material for: Creation of de novo cryptic splicing for ALS/FTD precision medicine
Source: Science. Author manuscript; Available in PMC 2024 Oct 21. (PMC7616720; doi:10.1126/science.adk2539)
Supplement: Supplementary Material [file EMS199220-supplement-Supplementary_Material.pdf]

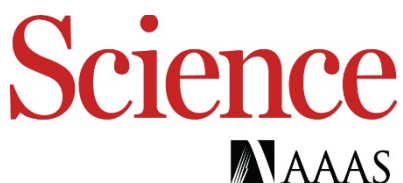

## Supplementary Materials for

### **Creation of de novo cryptic splicing for ALS/FTD precision medicine**

**Authors:** Oscar G. Wilkins<sup>1,2\*</sup>, Max Z.Y.J. Chien<sup>1,2†</sup>, Josette J. Wlaschin<sup>3†</sup>, Simone Barattucci<sup>1</sup>, Peter Harley<sup>1</sup>, Francesca Mattedi<sup>1</sup>, Puja R. Mehta<sup>1</sup>, Maria Pislakova<sup>1,2</sup>, Eugeni Ryadnov<sup>1</sup>, Matthew J. Keuss<sup>1</sup>, David Thompson<sup>4</sup>, Holly Digby<sup>2,5</sup>, Lea Knez<sup>1,2</sup>, Rebecca L. Simkin<sup>1</sup>, Juan Antinao Diaz<sup>6</sup>, Matteo Zanovello<sup>1,2</sup>, Anna-Leigh Brown<sup>1</sup>, Annalucia Darbey<sup>1</sup>, Rajvinder Karda<sup>6</sup>, Elizabeth M.C. Fisher<sup>1</sup>, Thomas J. Cunningham<sup>4,4a</sup>, Claire E. Le Pichon<sup>3</sup>, Jernej Ule<sup>2,5</sup>, Pietro Fratta<sup>1,2\*</sup>

Corresponding authors: [p.fratta@ucl.ac.uk](mailto:p.fratta@ucl.ac.uk), [oscar.wilkins.18@ucl.ac.uk](mailto:oscar.wilkins.18@ucl.ac.uk)

#### **The PDF file includes:**

Materials and Methods

figs. S1 to S10

Tables S1 to S4 (S2 and S4 are attached separately due to large size)

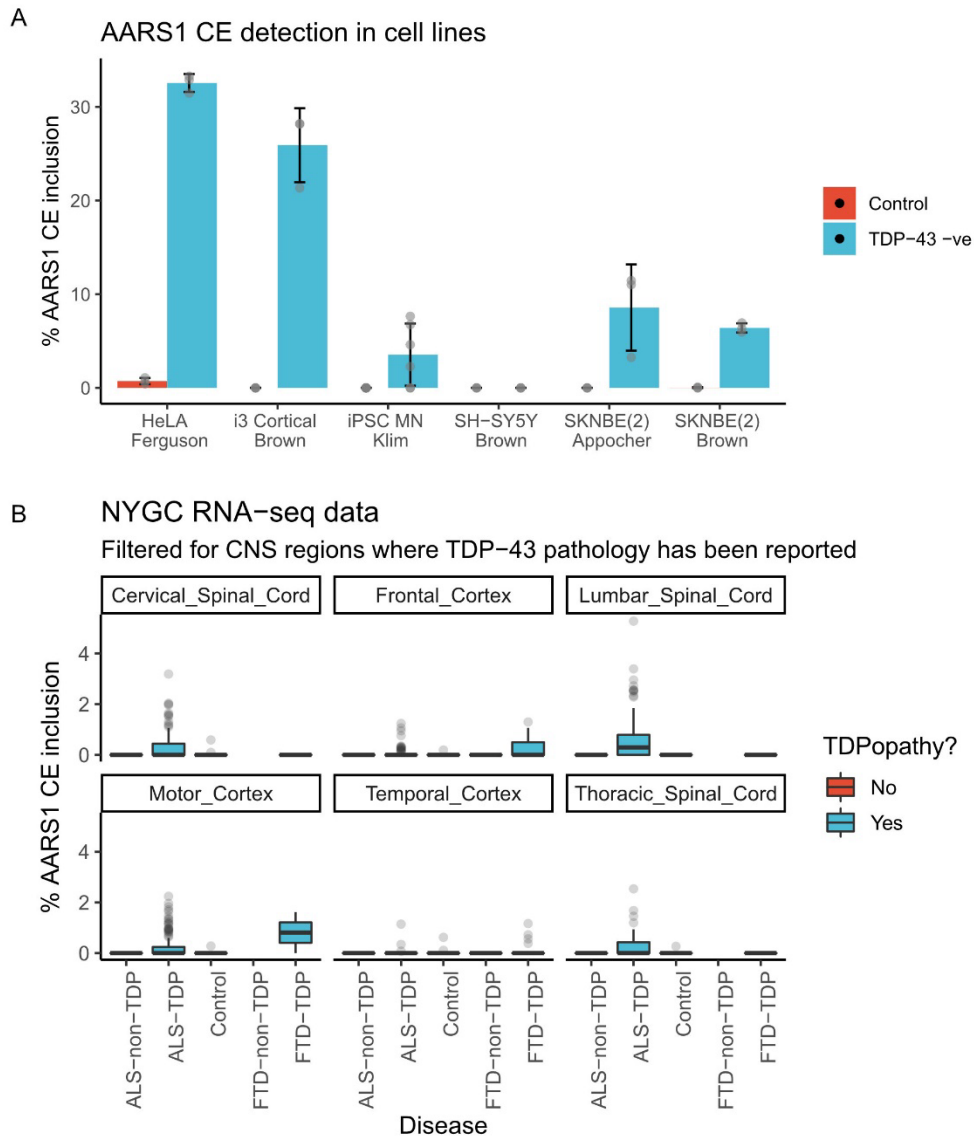

**Fig. S1.**

**A:** *AARS1* cryptic exon inclusion percentage for various cell lines in which TDP-43 levels were reduced artificially; error bars show standard deviation. **B:** *AARS1* cryptic exon inclusion for bulk RNA seq from various tissues and patients in the NYGC dataset.

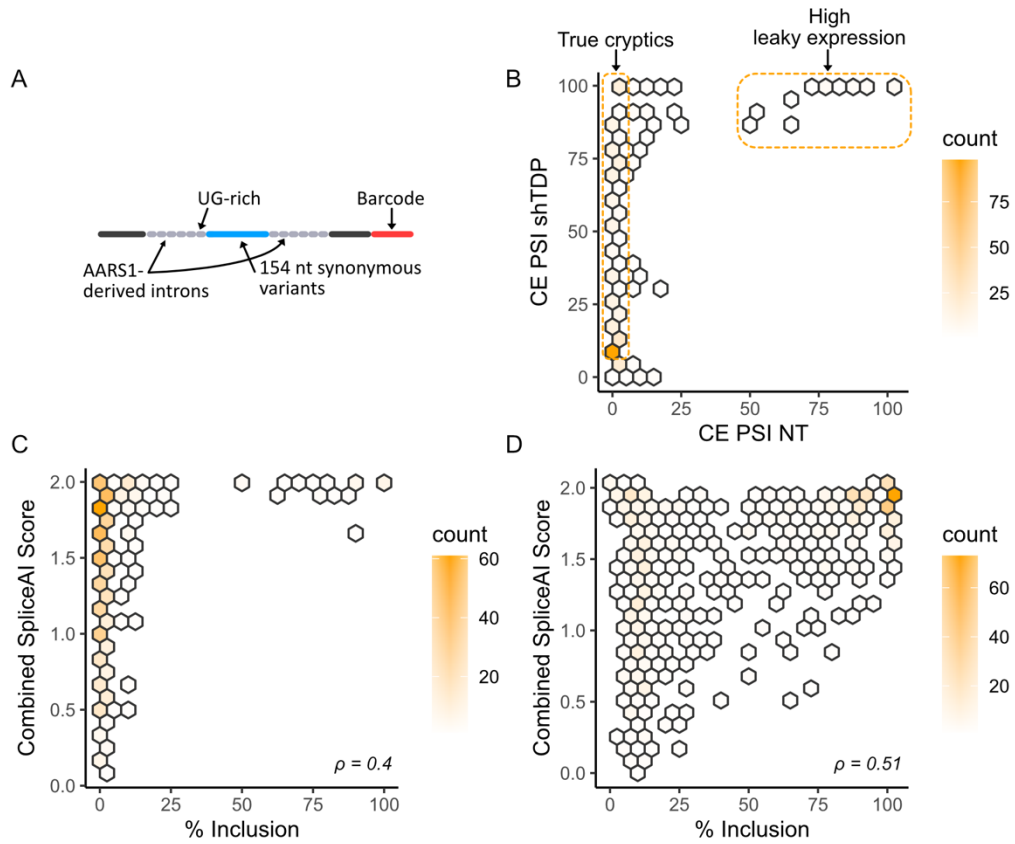

**Fig. S2.**

**A:** Schematic of the barcoded library of vectors containing different candidate CE sequences, each encoding the same amino acid sequence (in this case, a fragment of *S. pyogenes* Cas9) but with different codon optimization. **B:** Heatmap of % CE inclusion for library of Cas9-fragment-encoding cryptic exons in SK-N-BE(2) cells with TDP-43 knockdown versus untreated cells ("NT" = "not treated"). Areas corresponding to "True cryptics" (i.e. those that are only expressed upon TDP-43 knockdown) and "High leaky expression" (i.e. those that are expressed regardless of TDP-43 knockdown) are highlighted. **C:** Heatmap of the SpliceAI combined score of the candidate CE acceptor and donor splice sites against the PSI of each CE in SK-N-BE(2) cells without TDP-43 knockdown (i.e. untreated cells); Spearman correlation shown (bottom). **D:** Heatmap of the SpliceAI combined score of the candidate CE acceptor and donor splice sites against the PSI of each CE in SK-N-BE(2) cells with TDP-43 knockdown; Spearman correlation shown.



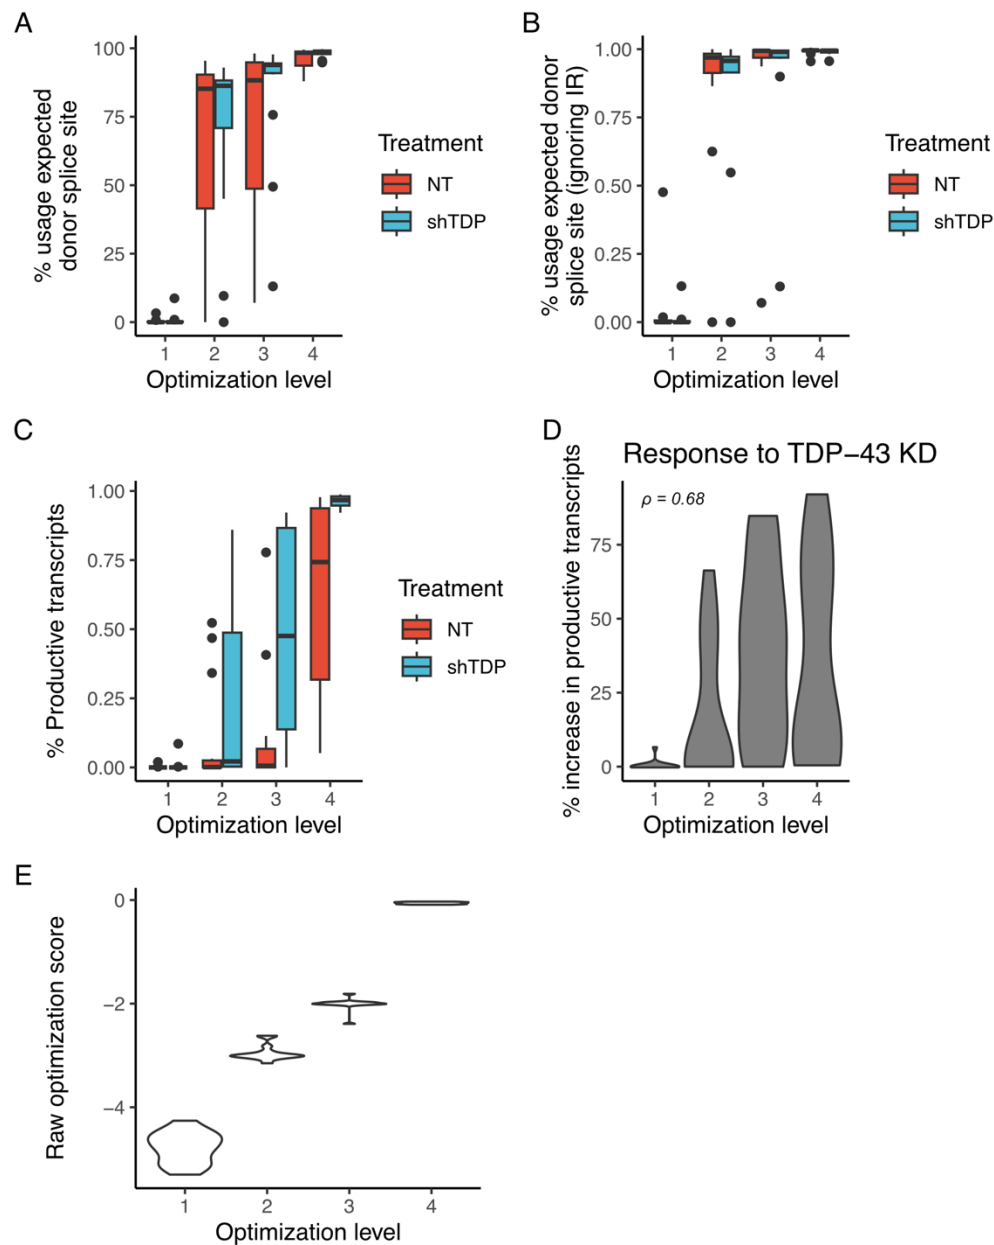

**Fig. S4**

More optimized vector sequences are more likely to be spliced in the desired manner. **A-B**: % usage of the expected donor splice site for sequences with different optimization levels, as assessed by the *SpliceNouveau* algorithm, including or ignoring intron retention (IR) respectively. **C**: The fraction of productive transcripts (i.e. transcripts that are predicted to express mScarlet) with or without TDP-43 knockdown, separated by optimization level. **D**: % increase in productive transcripts upon TDP-43 knockdown; Spearman's rho value, between optimization level and % increase, is indicated. **E**: Fitness scores for all fourteen vectors of each optimization level.

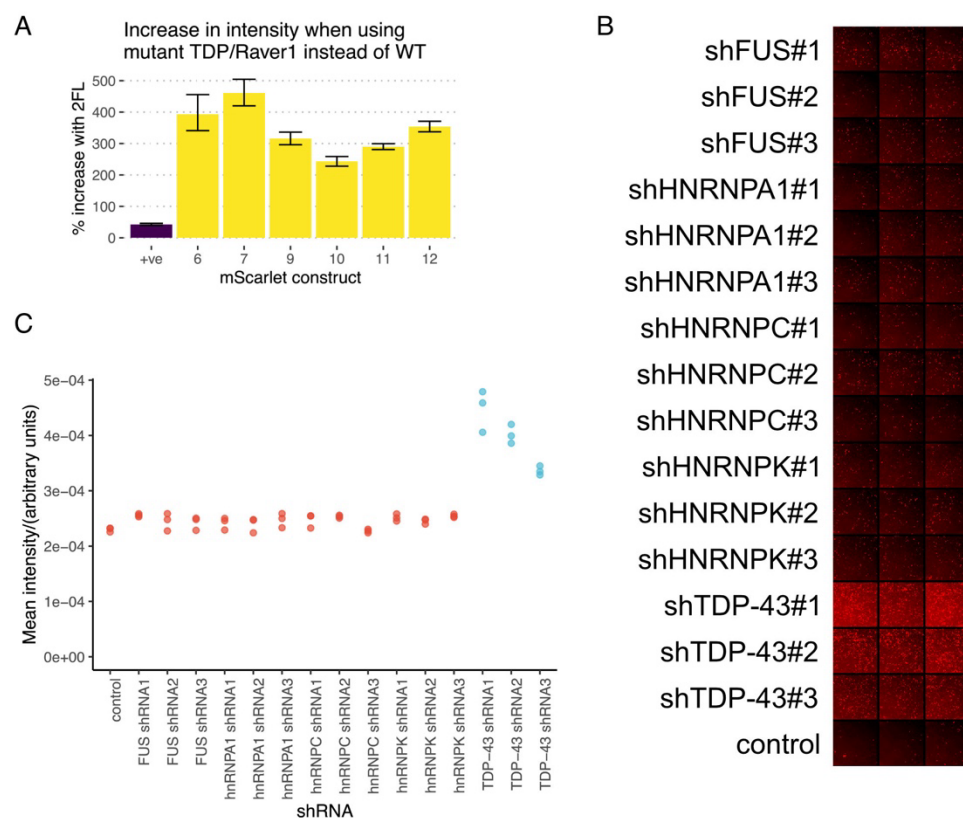

**Fig S5: A:** Comparison of the fluorescence of six TDP-REGv2 mScarlet constructs and a positive control transfected into SK-N-BE(2) cells with TDP-43 knockdown, when co-transfected with a mutant TDP-43/Raver1 fusion protein (which is unable to rescue splicing) versus when co-transfected with a functional TDP-43/Raver1 fusion protein; error bars show 90% confidence interval as determined by Monte-Carlo methods. **B:** Fluorescence microscopy of SK-N-BE(2) cells co-transfected with a plasmid encoding TDP-REGv2 mScarlet reporter #10 and plasmids encoding the most potent predicted shRNAs against FUS, hnRNPA1, hnRNPC, hnRNPK or TDP-43, or an identical plasmid but without an shRNA sequence. **C:** Quantification of fluorescence from images in part B.

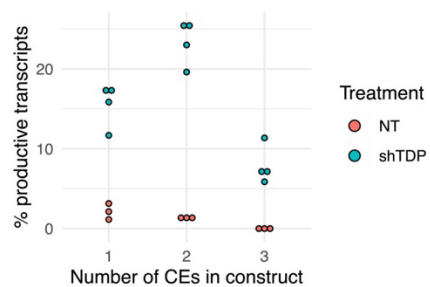

**Fig S6:** Percentage of productive transcripts, as determined by targeted Nanopore sequencing, from vectors encoding Cre-recombinase with 1, 2 or 3 cryptic exons without (NT) or with (shTDP) TDP-43 knockdown.

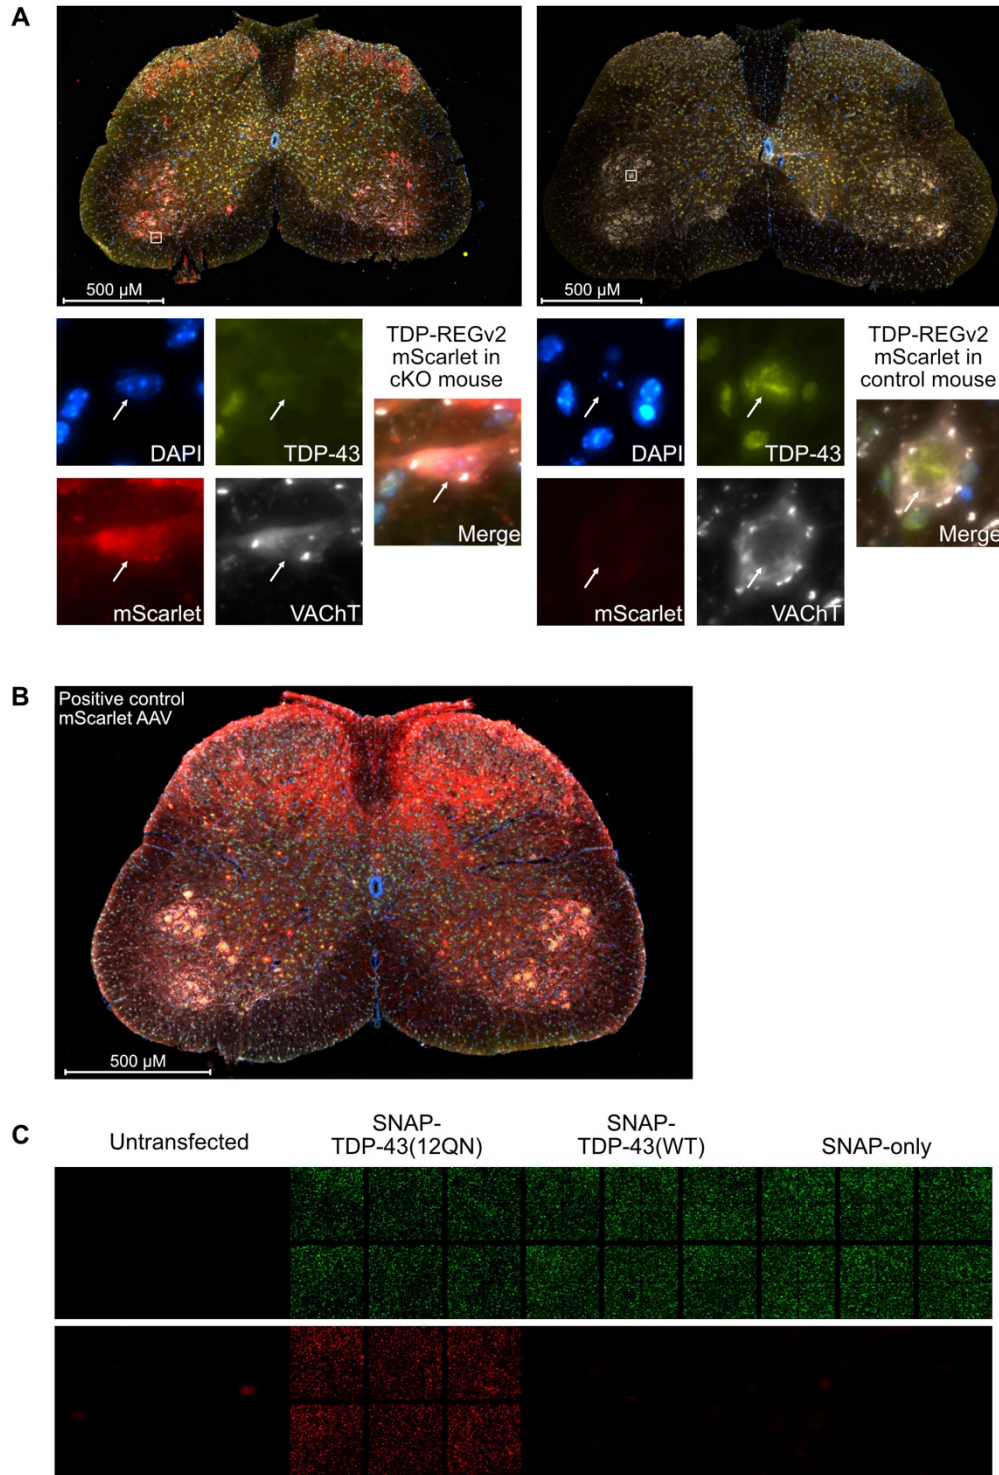

**Fig. S7.**

A: Fluorescence microscopy of spinal cord sections from TDP-43 cKO or control mice (left and right respectively) injected with a TDP-REGv2 mScarlet AAV (construct #7). Magnifications of two representative motor neurons are shown below; locations are shown in the full images by

white boxes. Blue = DAPI, Yellow = TDP-43, White = VaChT, Red = mScarlet). B: Representative fluorescence microscopy image of a spinal cord section from a control mouse injected with a positive control mScarlet AAV (i.e. without TDP-REG); coloring is the same as Part A. C: Fluorescence microscopy images of green (top) and red (bottom) fluorescence in cells co-transfected with the vectors encoding TDP-REGv2:mScarlet #7 the proteins indicated above plus an mGreenLantern-encoding transfection control; 6 replicates per condition were used.

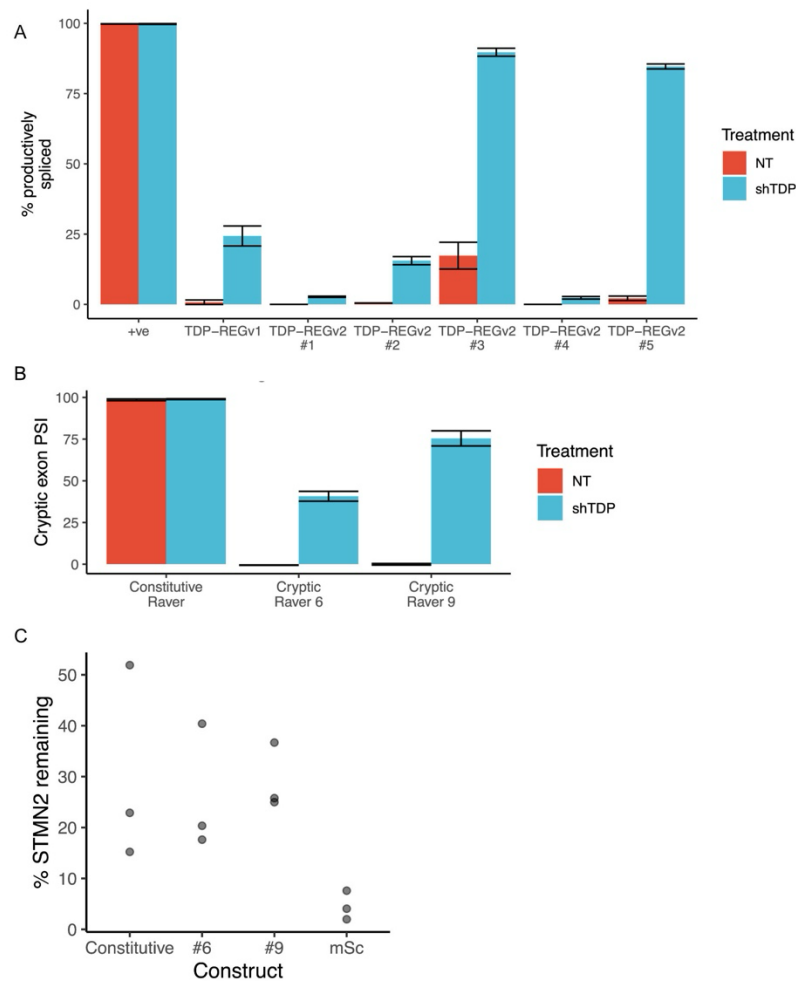

**Fig. S8.**

**A:** Nanopore sequencing of seven Luciferase constructs (one positive control, one TDP-REGv1, and five TDP-REGv2) with or without TDP-43 knockdown; error bars show standard deviation across replicates. **B:** Quantification of RT-PCRs detecting the internal cryptic exons present in TDP-REGv2 TDP-43/Raver1 constructs. In contrast with the data shown in Figure 4, in this figure the cells were stably expressing the vectors, and the TDP-43/Raver1 fusion protein was functional (i.e. without the 2FL mutation); error bars show standard deviation. **C:** Quantification of remaining STMN2 levels in three polyclonal SK-N-BE(2) lines of each construct (Constitutive TDP-43/Raver1, TDP-REGv2:TDP-43/Raver1 #6 and #9, and mScarlet) with doxycycline-induced TDP-43 knockdown; each value is normalized per-lane to tubulin, then normalized per-line to the untreated control.

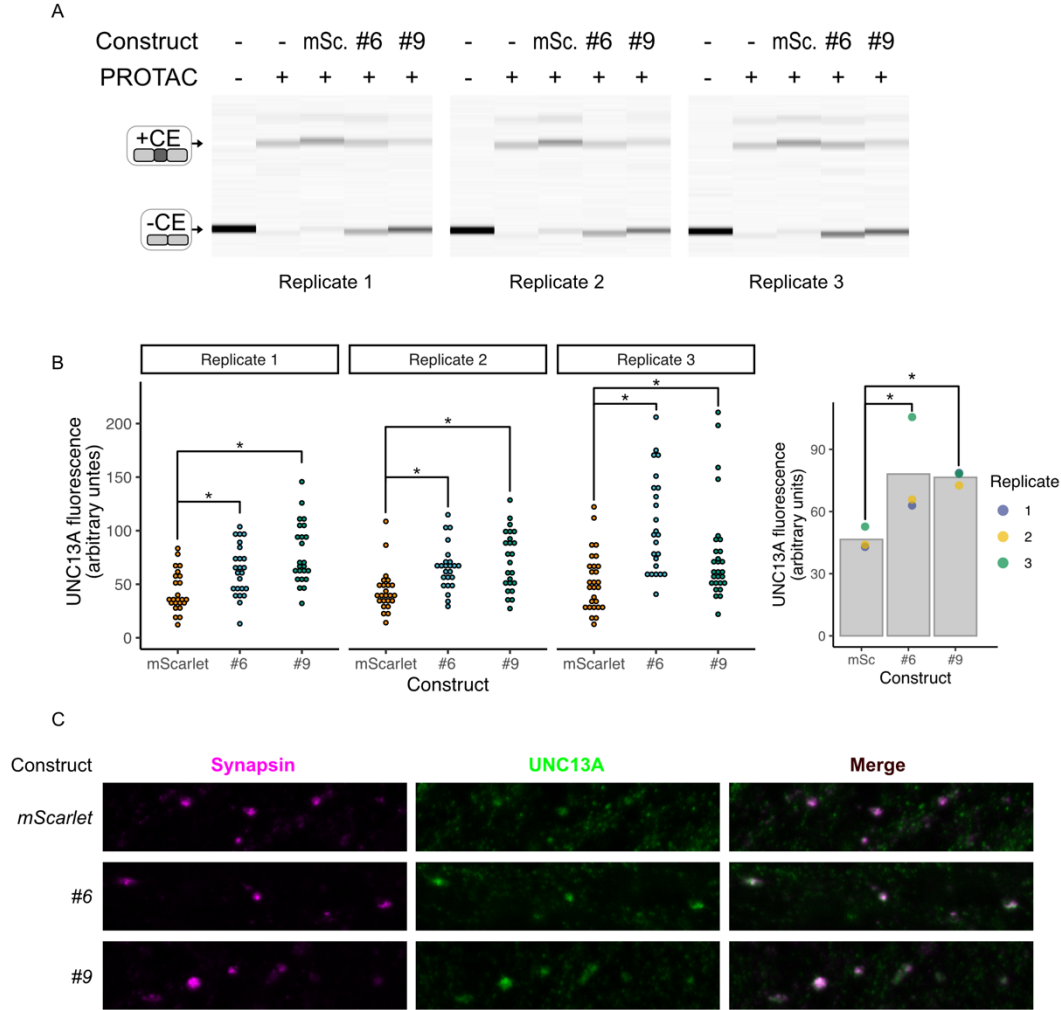

**Fig. S9:** A: Three replicates of RT-PCRs against the UNC13A CE for i3 cortical neurons, featuring Halo-tagged endogenous TDP-43 (thus enabling PROTAC-mediated degradation), with stably-integrated piggyBac vectors encoding either mScarlet or TDP-43/Raver1 (TDP-REGv2 TDP/Raver1 vectors #6 and #9); replicates are from separate wells. B: Quantification of UNC13A fluorescence in synapses formed by the piggyBac lines described in Part A. UNC13A staining is significantly lower for mScarlet lines than TDP-43/Raver1 #6 and #9 lines in all three replicates. Left: raw values from individual replicates (\* = padj < 0.05; Dunn's test); Right: mean values from each replicate, bar graphs show mean of the three mean values (\* = padj < 0.05, ratio t-test with Benjamini-Hochberg correction) C: Example fluorescence microscopy images used for the quantification in Part B, stained with antibodies against Synapsin (purple) or UNC13A (green).

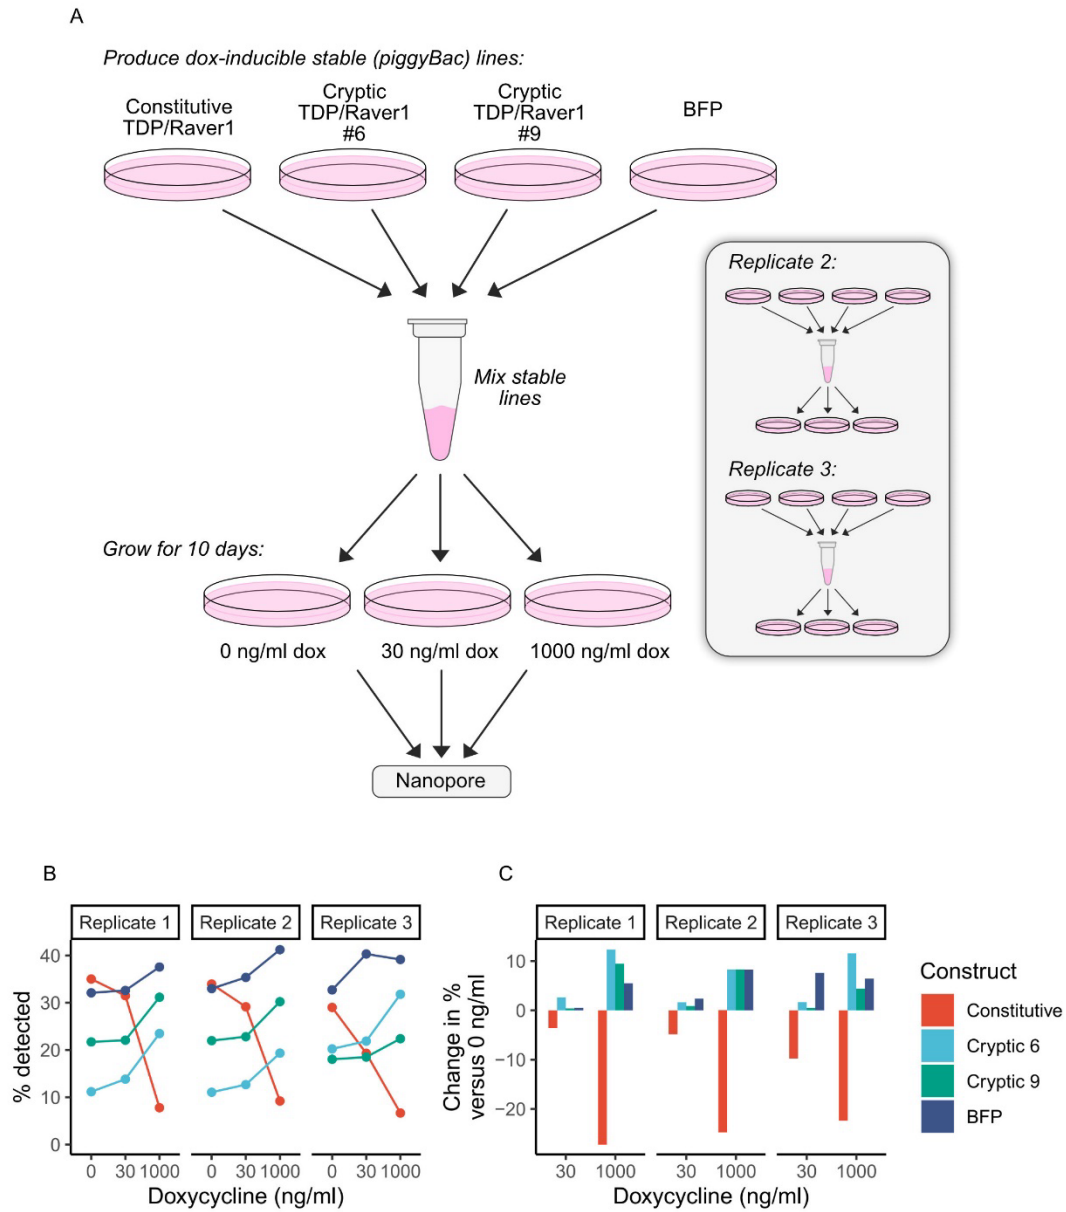

**Fig. S10.**

**A:** A schematic showing the experimental procedure for the growth competition assay. **B:** Quantification of Nanopore reads derived from each of the four constructs used to make stable piggyBac lines for each doxycycline concentration and each replicate. (Note that differences in % at 0 ng/ml doxycycline can be explained by PCR bias during Nanopore library preparation and unequal initial mixtures of the different lines; comparisons are only valid between doxycycline concentrations within the same replicate.) **C:** A second visualization of the same Nanopore data, where values for each construct are compared with their equivalent value when no doxycycline was added, for clarity.

**Table S1.**

Antibodies used in western blotting and microscopy experiments.

| Target                       | Brand             | Product code | Lot         | Use                                                         |
|------------------------------|-------------------|--------------|-------------|-------------------------------------------------------------|
| Anti-Mouse IgG1 (HRP)        | Abcam             | ab97240      | GR3365481-1 | Western blotting                                            |
| Anti-Rabbit IgG H&L (HRP)    | Abcam             | ab6721       | GR3242092-4 | Western blotting                                            |
| FLAG                         | Sigma             | F3165        | 035K6196    | Western blotting                                            |
| $\alpha$ -Tubulin            | Sigma             | T5168        | 038M4813V   | Western blotting                                            |
| TDP-43                       | Proteintech       | 10782-2-AP   | 103682      | Western blotting; immunofluorescence of neuroblastoma lines |
| Rabbit IgG (Alexa Fluor 647) | Abcam             | ab150079     | GR3444080-1 | Immunofluorescence of neuroblastoma lines                   |
| TDP-43                       | Biologend         | 808301       | B305604     | Immunostaining of tissue                                    |
| RFP                          | Rockland          | 600-401-379  | 46317       | Immunostaining of tissue                                    |
| VACHT                        | Synaptic Systems  | 139105       | 4-26        | Immunostaining of tissue                                    |
| Rabbit IgG                   | Life Tech. Thermo | A-21207      | 2563838     | Immunostaining of tissue                                    |
| Rat IgG                      | Invitrogen        | A21208       | 206333      | Immunostaining of tissue                                    |
| Guinea pig IgG               | Invitrogen        | A21450       | 2446026     | Immunostaining of tissue                                    |
| STMN2 polyclonal antibody    | Proteintech       | 10586-1-AP   | 65379       | Western blotting                                            |
| Munc13-1                     | Synaptic Systems  | 126-104      | 1-7         | Staining of synapses                                        |
| Synapsin                     | Synaptic Systems  | 106-011      | 1-51        | Staining of synapses                                        |

**Table S2.**

Details of animal experiments

See attached material

**Table S3.**

Primers used for RT-PCRs

| Name                     | Sequence                                     | Purpose                                                                                                                                      |
|--------------------------|----------------------------------------------|----------------------------------------------------------------------------------------------------------------------------------------------|
| AARS1 forward            | ACTTACTTTGGCGGGGATGA                         | RT-PCR of endogenous cryptic splicing                                                                                                        |
| AARS1 reverse            | AGGTTCCAGATCTCCAGCAC                         | RT-PCR of endogenous cryptic splicing                                                                                                        |
| UNC13A forward           | GTTCAAGAGGGAATCTGACG                         | RT-PCR of endogenous cryptic splicing                                                                                                        |
| UNC13A reverse           | GGGCACATATACTTGGAGGAG                        | RT-PCR of endogenous cryptic splicing                                                                                                        |
| STMN2 forward            | GCTCTCTCCGCTGCTGTAG                          | RT-PCR of endogenous cryptic splicing                                                                                                        |
| STMN2 cryptic reverse    | CTGTCTCTCTCTCTCGCACA                         | RT-PCR of endogenous cryptic splicing                                                                                                        |
| STMN2 downstream reverse | CGAGGTTCCGGGTAAAAGCA                         | RT-PCR of endogenous cryptic splicing                                                                                                        |
| check_tdp_splice_R_v2    | ATTGCTGATGTGTACAGAGATGC                      | Analysing splicing of vectors encoding TDP-43/Raver1 fusion protein RT-PCR; amplifying TDP-43/Raver1 constructs in growth competition assay; |
| check_tdp_splice_F       | GATTTGTCAGGTTCACTGAGTATGAG                   | Analysing splicing of vectors encoding TDP-43/Raver1 fusion protein RT-PCR; amplifying TDP-43/Raver1 constructs in growth competition assay  |
| nRV_growthC_BFP_F        | GGAGATCGATTCCGGATG<br>tcttcaagcagtccttccctg  | Amplifying BFP construct in growth competition assay                                                                                         |
| nRV_growthC_BFP_R        | GCCTTCCACTAGATTCC<br>ACCCACTACCatTAagcttgtgc | Amplifying BFP construct in growth competition assay                                                                                         |
| Cas9_splice_F            | cgatctgctgaaaattatcaaggacaag                 | Check splicing of PE-Max vector via RT-PCR                                                                                                   |
| Cas9_splice_R            | tccaccaccttcactgtctg                         | Check splicing of PE-Max vector via RT-PCR                                                                                                   |

**Table S4**

See attached material
